# Supplementary material for: Overexpression of a novel MADS-box gene SlFYFL delays senescence, fruit ripening and abscission in tomato
Source: PubMed Central journal article supplement — Sci Rep. 2014 Mar 13;4:4367. doi: 10.1038/srep04367 (PMC3952145; doi:10.1038/srep04367), 2014-03-13
Supplement: srep04367-s1.pdf [file srep04367-s1.pdf]

## Supplemental Data

### Overexpression of a novel MADS-box gene *SIFYFL* delays senescence, fruit ripening and abscission in tomato

Qiaoli Xie, Zongli Hu, Zhiguo Zhu, Tingting Dong, Zhiping Zhao, Baolu Cui, Guoping Chen\*

#### Results

**Generation of transgenic tomato plants.** The pBI121 binary vector containing *SIFYFL* was created and transformed into wild type tomato plants via *Agrobacterium*-mediated T-DNA transformation. Twenty independent transgenic lines were confirmed to be positive transgenic lines by PCR analysis using specific primers for the reporter gene *NPTII*. Quantitative real-time PCR results showed that *SIFYFL* was successfully overexpressed in these transgenic plants, and expression levels of *SIFYFL* in three transgenic lines: OE-1, OE-7 and OE-17, were approximately 25- to 42-fold higher than in wild type leaves (Fig. 1S B). Subsequently these three transgenic lines were selected for further investigation. In all stages of transgenic fruits, *SIFYFL* was significantly overexpressed, especially in B+7 stage fruit, which showed more than a 10-fold increase in *SIFYFL* expression level compared with wild type (Fig. 1S A). In fruit AZs of transgenic lines, *SIFYFL* expression was increased approximately 8-fold than wild type (Fig. 1S C). Furthermore, *SIFYFL* was also remarkably upregulated in transgenic flower sepals (Fig. 1S D).

**The sepals of 35S:*FYFL* flower were longer than those of wild type.** In our study, we found that the 35S:*FYFL* lines represented longer sepals than wild type

(Fig. S3 A, B). Sepal length statistics showed that sepals of *35S:FYFL* lines were 4-5 mm longer than that of wild type (Fig. S3 C). *SIMADS-MC* was reported to influence sepal development <sup>1</sup>. Quantitative PCR results displayed that *SIMADS-MC* was down-regulated in sepal of *35S:FYF* lines (Fig. S3 D). Moreover, expression pattern of *SIFYFL* in sepal indicated that *SIFYFL* might play an important role in development of sepal (Fig.1 C). These results hint that overexpression of *SIFYFL* might suppress the expression of *SIMADS-MC*, thus *35S:FYFL* plants produce longer sepals.

## Method

**Statistical analysis.** The mean values of data were from the measurements of replicates and ‘Standard Error’ of the means were calculated. Data were analyzed by Origin 8.6 software, using *t* test to assess significant differences among the means.

## Figure caption

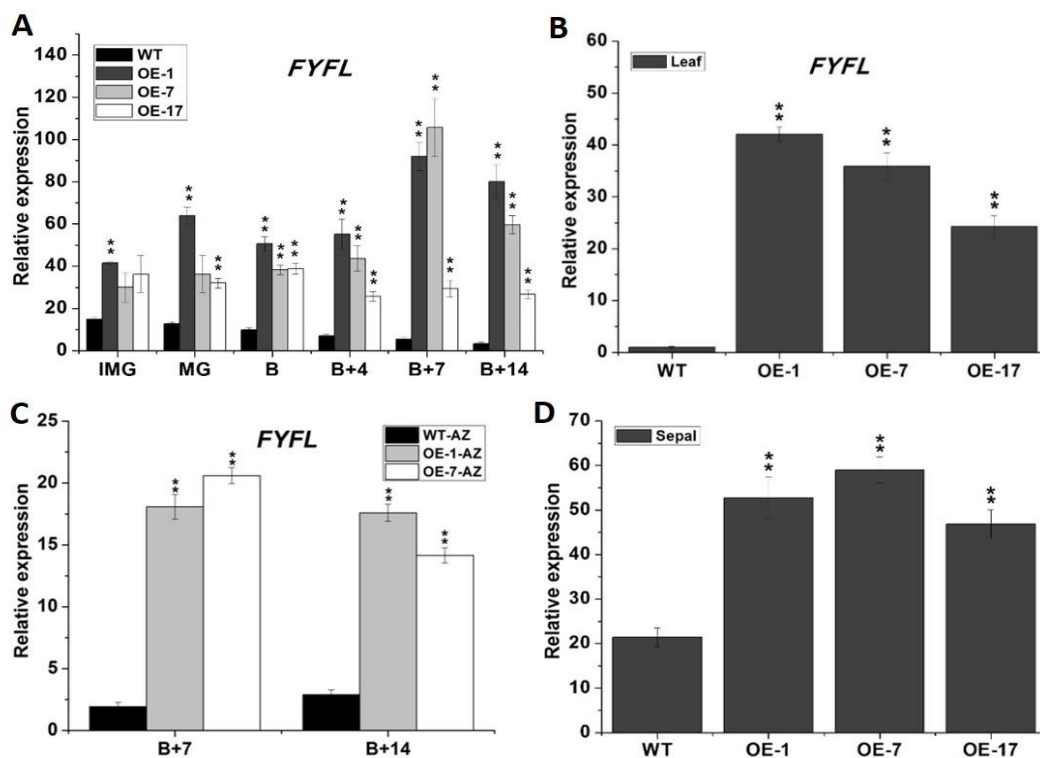

**Fig. 1 S** Expression of *FYFL* in WT and *35S:FYFL* lines. The relative overexpression of *FYFL* in fruit (A), leaf (B), AZ (C) and sepal (D) of wild type and *35S:FYFL* lines. IMG, immature green fruit; MG, mature green fruit; B, breaker fruit; B+4, 4 days after breaker fruit; B+7, 7 days after breaker fruit; B+14, 14 days after breaker fruit; AZ, abscission zone of flower in anthesis. WT, wild type; OE-1, OE-7, OE-17, different transgenic lines. The data represent mean from three replicates with three biological repeats. \*, indicate  $P < 0.05$ , \*\*, indicate  $P < 0.01$  between the wild type and others by *t*-test. Error bars indicate SE.

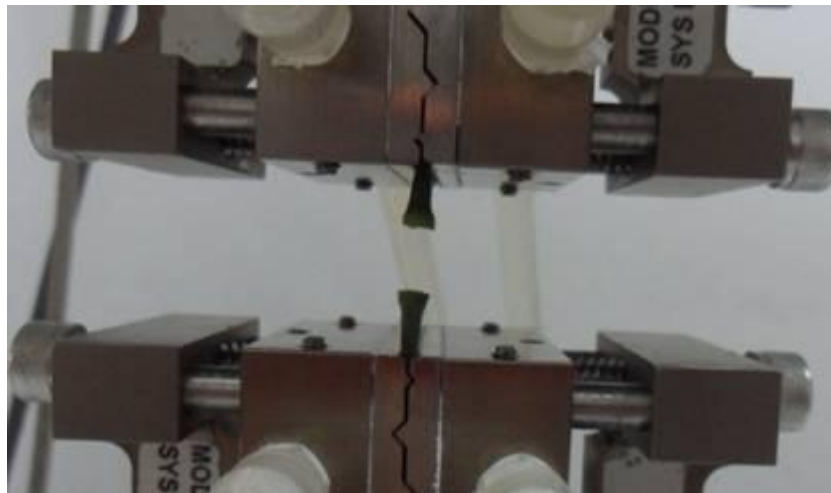

**Fig. 2 S** Breakstrength test Meter

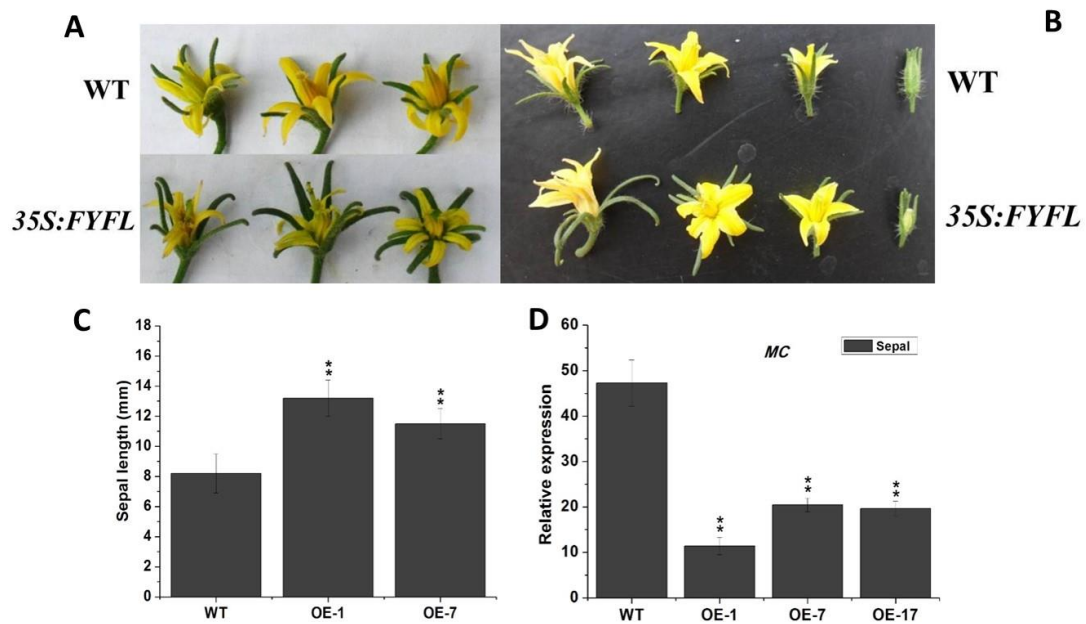

**Fig. 3 S** Sepals phenotype of wild type and transgenic lines and analysis of related gene. Phenotype (**A**) and (**B**) of sepals in different stages of flower development of wild type and transgenic lines. (**C**) Sepal length statistics in anthesis of wild type and transgenic lines. n=60. (**D**) Expression analysis of *MC* of sepals in anthesis of wild type and transgenic lines. WT, wild type; OE-1, OE-7, OE-17, different transgenic lines. The data represent mean from three replicates with three biological repeats. \*, indicate  $P < 0.05$ , \*\*, indicate  $P < 0.01$  between the wild type and others by *t*-test. Error bars indicate SE.

1 Vrebalov, J. *et al.* A MADS-box gene necessary for fruit ripening at the tomato ripening-inhibitor (*rin*) locus. *Science* **296**, 343-346 (2002).

**Table 1S.** Primers used for PCRs and qRT-PCRs in this study

| Primers             | Primer sequence: forward primer (5'–3' top),<br>reverse primer (5'–3' bottom) | Products(/bp) |
|---------------------|-------------------------------------------------------------------------------|---------------|
| <i>SIFYFL</i>       | CTATTTCTTTTCCATCCTCTT<br>GGTATTATTTATTGAATTTTGC                               | 1074          |
| <i>SIFYFL</i> (F+X) | TCTAGACTATTTCTTTTCCATCCTCTT                                                   | 1092          |

---

|                     |                                        |      |
|---------------------|----------------------------------------|------|
| <i>SIFYFL</i> (R+S) | <u>GAGCTCGGTATTATTTATTGAATTTTGC</u>    |      |
| <i>SIFYFL</i> (RT)  | CAGCCA <u>ACTGGAGAGGACCC</u>           | 138  |
|                     | CTAAGCCCGCACTTTT <u>CACG</u>           |      |
| <i>SIFYFL</i> (Y)   | CCGGAATTCATGAAAAGAATAGAAAATTCAACG      | 708  |
|                     | GAA <u>ACTGCAGCTATAAGCAGCGCGTTTGAG</u> |      |
| <i>SIRIN</i> (Y)    | CCGGAATTCATGGGTAGAGGGAAAGTAGA          | 1212 |
|                     | CGCGGATCCTCATAGATGTTTATTCAT            |      |
| <i>SIMADSI</i> (Y)  | CCGGAATTCATGGGAAGAGGAAGAGTTG           | 760  |
|                     | CGCGGATCCTTAAAGCATCCATCCATGAATA        |      |
| <i>SIJ</i> (Y)      | CCGGAATTCATGGCTAGAGAAAAAATTCAGATC      | 816  |
|                     | CGCGGATCCATCAGCCTGAGTAAGGTAGCCC        |      |
| <i>SICAC</i> (RT)   | CCTCCGTTGTGATGTA <u>ACTGG</u>          | 173  |
|                     | ATTGGTGGAAGTAACATCATCG                 |      |
| <i>SIEF1</i> (RT)   | ACCTTTGCTGAATACCCTCCATTG               | 150  |
|                     | CACACTTCACTTCCCCTTCTTCTG               |      |
| <i>E4</i> (RT)      | AGGGTAACAACAGCAGTAGCA                  | 167  |
|                     | CCCAACCTCCGTCTT <u>CAC</u>             |      |
| <i>E8</i> (RT)      | GGCACCATTCAACATACCG                    | 242  |
|                     | CTTTCACCGAAGAAGCACG                    |      |
| <i>PSY1</i> (RT)    | AGAGGTGGTGGAAAGCAA                     | 298  |
|                     | TCTCGGGAGTCATTAGCAT                    |      |
| <i>PDS</i> (RT)     | GCTTTACCCGCTCCTT <u>TA</u>             | 174  |
|                     | ACCTTGCTTTCTCATCCA                     |      |
| <i>ZDS</i> (RT)     | GGTGGGTGCTGAAAAAAAT                    | 93   |
|                     | GGAAAGCGGAAATCAAGTT                    |      |
| <i>RIN</i> (RT)     | GGAACCCAAACTTCATCAGA                   | 117  |
|                     | TTGTCCCAAATCCTCACCTA                   |      |
| <i>ACO1</i> (RT)    | ACAAACAGACGGGACACGAA                   | 181  |
|                     | CTCTTTGGCTTGAAACTTGA                   |      |
| <i>ACO3</i> (RT)    | CAAGCAAGTTTATCCGAAAT                   | 113  |
|                     | CATTAGCTTCCATAGCCTTC                   |      |
| <i>ACS1A</i> (RT)   | AGAATAGTAATGAGTGGAGGAGCAA              | 171  |
|                     | ATTACA <u>ACTTTCACAAACA</u> ACTGGA     |      |
| <i>ACS2</i> (RT)    | GAAAGAGTTGTTATGGCTGGTG                 | 107  |

---

|                   |                             |     |
|-------------------|-----------------------------|-----|
|                   | GCTGGGTAGTATGGTGAAGGT       |     |
| <i>ACS6</i> (RT)  | TGATCCTGGTGATGCATTTCTAGTTC  | 146 |
|                   | CTTCTTCTAAGGCTTCTTTTGTTACC  |     |
| <i>PG</i> (RT)    | ATACAACAGTTTTTCAGCAGTTCAAGT | 188 |
|                   | GGTTTTCCACTTTCCTACTAA       |     |
| <i>ERF1</i> (RT)  | TTTTAGTATCGGATGGACG         | 102 |
|                   | GGCGGAGAAACAGAAGTA          |     |
| <i>J</i> (RT)     | CTCTTGAAACTGGATTGAGCCG      | 86  |
|                   | CATACCCTTTTGTGGAGTTGG       |     |
| <i>MC</i> (RT)    | AAGTAGCAGAAGCAAGGAGGA       | 113 |
|                   | CAAGCGATTAGCAAAGAGTGA       |     |
| <i>GOB</i> (RT)   | CTGAACTTGACTGTATGTGGAGC     | 158 |
|                   | GAACGTTTACAACAAAGTGACAAT    |     |
| <i>WUS</i> (RT)   | TTTGGCTGCTCTTGAAGTACTCT     | 128 |
|                   | ACATTACCATAAGGTCCAAATAGC    |     |
| <i>Cel2</i> (RT)  | TTTTCAACAAACCCAAACCCA       | 98  |
|                   | TCTTGAAAATAGGGTCTGGCGTCT    |     |
| <i>TAPG1</i> (RT) | TTGGAGTAAATGGGAAGAGGAA      | 98  |
|                   | ATCACATGGAGTAGGCAATGGT      |     |
| <i>Ls</i> (RT)    | TGTTTTCTACCTCCACCGCCT       | 115 |
|                   | ATGATTTGCTTCCTTCTCCGC       |     |
| <i>Bl</i> (RT)    | GGAAGATTTGATAGTTGTGTTG      | 91  |
|                   | CAAAAATAGAGCTACACAAAACC     |     |

**Table 2S. Days from pollination to B stage for wild-type and transgenic lines (n=8)**

| <b>tomato lines</b> | <b>Days</b> |
|---------------------|-------------|
| wild-type           | 36.0±0.50   |
| OE-1                | 41.5±0.18   |
| OE-7                | 40.2±0.38   |
| OE-17               | 39.3±0.40   |
